# Supplementary material for: Injectable and self-healing nanocomposite hydrogel loading needle-like nano-hydroxyapatite and graphene oxide for synergistic tumour proliferation inhibition and photothermal therapy
Source: Royal Society of Chemistry journal article supplement (doi:10.1039/d1tb01753e), 2021-01-01
Supplement: d1tb01753e1.pdf [file d1tb01753e1.pdf]

Electronic Supplementary Information for:

**Injectable and self-healing nanocomposite hydrogel loading  
needle-like nano-hydroxyapatite and graphene oxide for the  
synergistic tumour proliferation inhibition and photothermal  
therapy**

Yujie Qia, Zhiyi Qiana, Weizhong Yuan<sup>a\*</sup> and Zhihong Li<sup>b\*</sup>

*<sup>a</sup>School of Materials Science and Engineering, Tongji University, Shanghai 201804, People's Republic of China. E-mail address: yuanwz@tongji.edu.cn (W. Yuan). Tel: +86 21 69580234, Fax: +86 21 69584723*

*<sup>b</sup>Division of General Surgery, Shanghai Pudong New District Zhoupu Hospital, Shanghai 201200, PR China. E-mail address: lance007@126.com*

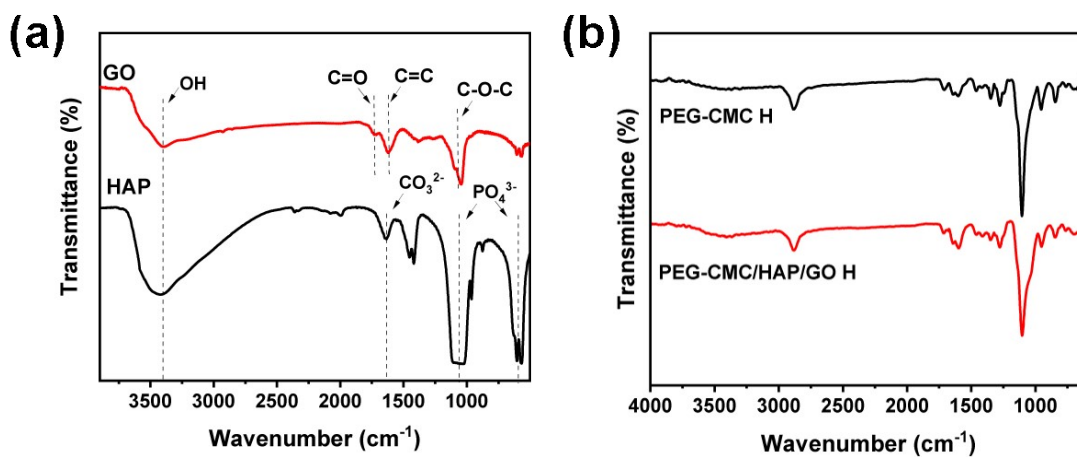

**Fig. S1** (a) FT-IR spectra of GO and HAP. (b) ATR FT-IR spectra of PEG-CMC hydrogel and PEG-CMC/HAP/GO hydrogel.

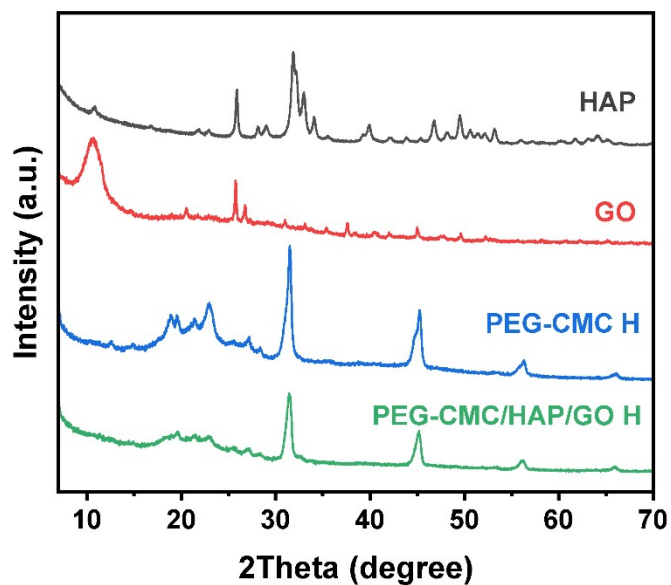

**Fig. S2** XRD spectra of GO, HAP, PEG-CMC hydrogel and PEG-CMC/HAP/GO hydrogel.

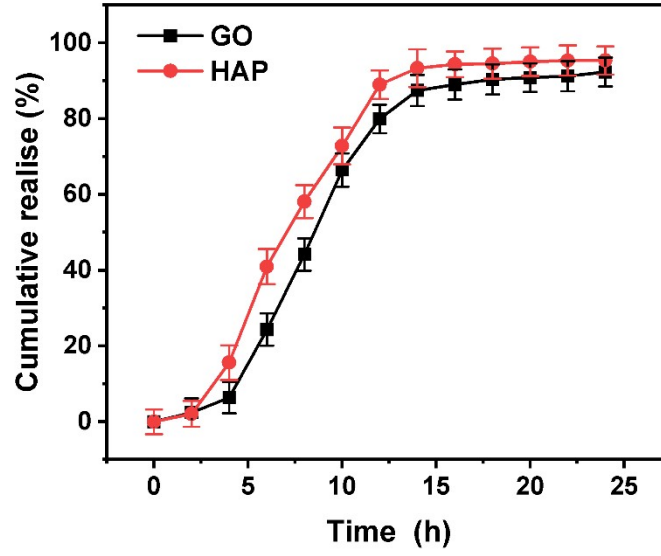

**Fig. S3** The GO and HAP release profile of the PEG-CMC/HAP/GO hydrogel.

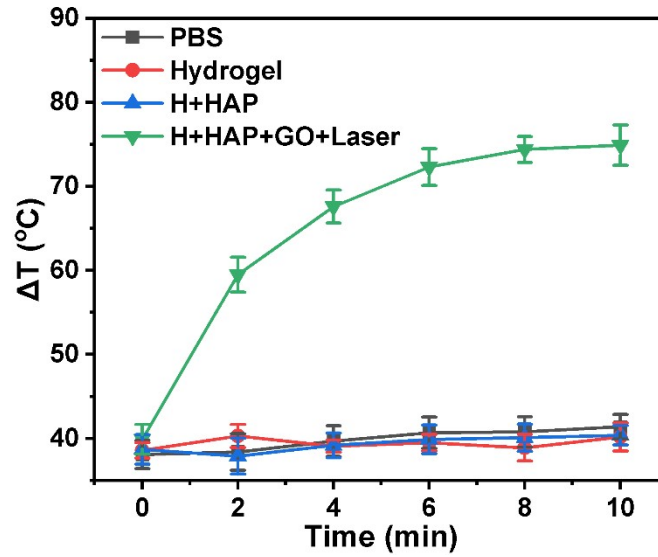

**Fig. S4** Temperature rise curve of tumor location in mice after NIR irradiation.

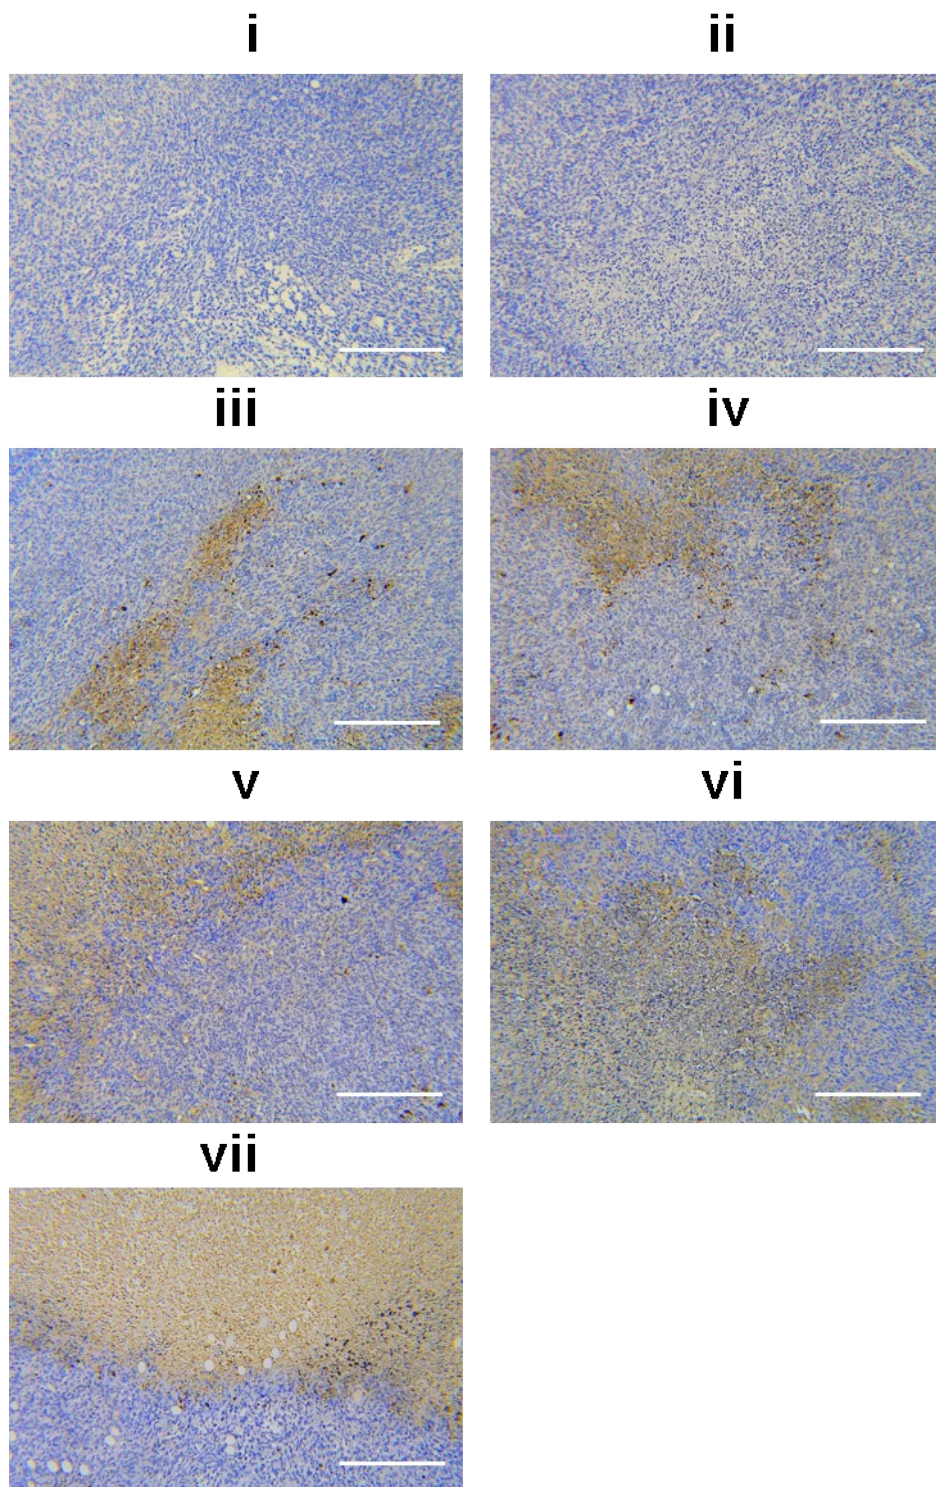

**Fig. S5** TUNEL analysis of tumours under different treatments (i-vii: PBS, Hydrogel, Hydrogel+HAP, Hydrogel+HAP+GO, HAP+GO+Laser, Hydrogel+GO+Laser, Hydrogel+HAP+GO+Laser) (scale bar: 300  $\mu$ m).
